# Supplementary material for: Removal of As3+, As5+, Sb3+, and Hg2+ ions from aqueous solutions by pure and co-precipitated akaganeite nanoparticles: adsorption kinetics studies
Source: Royal Society of Chemistry journal article supplement (doi:10.1039/d0ra08075f), 2020-01-01
Supplement: d0ra08075f1.pdf [file d0ra08075f1.pdf]

## Removal of As<sup>3+</sup>, As<sup>5+</sup>, Sb<sup>3+</sup>, and Hg<sup>2+</sup> Ions from Aqueous Solutions by Pure and Co-Precipitated Akaganeites Nanoparticles: Adsorption Kinetic Studies.

Verónica Villacorta,<sup>\*a</sup> César Augusto Barrero,<sup>a</sup> Belén Turrión,<sup>b</sup> Francisco Lafuente,<sup>b</sup> Jean-Marc Greneche,<sup>c</sup>  
Karen Edilma García,<sup>a</sup>

<sup>\*</sup>Corresponding author

<sup>a</sup>Solid State Group, Faculty of Exact and Natural Sciences, University of Antioquia – UdeA. Medellín, Street 67 N°53-108, Colombia.

E-mail [vvillacortal@unal.edu.co](mailto:vvillacortal@unal.edu.co)

<sup>b</sup>Institute on Sustainable Forest Management; Department of Agroforestry Sciences. Area of Soil Science and Agricultural Chemistry, University of Valladolid, Palencia, Spain.

<sup>c</sup>Institut des Molécules et Matériaux du Mans – IMMM UMR CNRS 6283. Université du Maine. Le Mans, 72085, France

**Table SI\_1.** Equations of kinetic models of adsorption used to fit the experimental data. In these equations  $Q$  is the amount of adsorbate sorbed at instant  $t$  ( $\text{mg g}^{-1}$ ),  $Q_{\text{max}}$  is the maximum amount of adsorbate sorbed ( $\text{mg g}^{-1}$ ),  $t$  is the time (min),  $k'_{ad}$  is pseudo adsorption rate constant (unit for order 1:  $\text{min}^{-1}$ , order 2:  $\text{g mg}^{-1} \text{min}^{-1}$ , unit for Langmuir:  $\text{min}^{-1}$ ),  $k_d$  is desorption rate constant ( $\text{min}^{-1}$ ),  $\vartheta$  is a parameter of Bangham model,  $k$  is Bangham diffusion rate ( $\text{mg g}^{-1} \text{min}^{-\vartheta}$ ),  $\beta$ , in the Elovich model, is the constant related to the extent of surface coverage and activation energy for chemisorption ( $\text{g mg}^{-1}$ ) and  $\alpha$  is the initial sorption rate ( $\text{mg g}^{-1} \text{min}^{-1}$ ).

| Kinetic model                                   | Nonlinear form                                                                                                       |
|-------------------------------------------------|----------------------------------------------------------------------------------------------------------------------|
| Langmuir                                        | $Q = Q_{\text{max}} \left( \frac{k'_{ad}}{k'_{ad} + k_d} \right) \left( 1 - e^{-(k'_{ad} + k_d)t} \right) \quad (2)$ |
| Lagergren                                       | $Q = Q_{\text{max}} \left( 1 - e^{-k'_{ad}t} \right) \quad (3)$                                                      |
| Bangham                                         | $Q = kt^{\vartheta} \quad (4)$                                                                                       |
| Ho and McKay                                    | $Q = \frac{(k'_{ad}Q_{\text{max}}^2)t}{1 + k'_{ad}Q_{\text{max}}t} \quad (5)$                                        |
| Elovich                                         | $Q = \left( \frac{1}{\beta} \right) \text{Ln}(1 + \alpha\beta t) \quad (6)$                                          |
| Simplified Elovich<br>( $1 \ll \alpha\beta t$ ) | $Q = \left( \frac{1}{\beta} \right) \text{Ln}(\alpha\beta t) \quad (7)$                                              |

**Table SI\_2.** Experimental mean adsorption capacity at 60 min of a given adsorbate on a given adsorbent. This data can be related to the maximum adsorption capacity,  $Q_{max}$ .

| Sample                  | Experimental $Q_{max}$<br>(mg adsorbed adsorbate g <sup>-1</sup> adsorbent) |
|-------------------------|-----------------------------------------------------------------------------|
| pAk-Hg                  | 4.12 ± 0.21                                                                 |
| Ak60Hg-Hg               | 4.40 ± 0.22                                                                 |
| Ak60Sb-Hg               | 5.51 ± 0.28                                                                 |
| Ak60As-Hg               | 6.02 ± 0.30                                                                 |
| pAk-Sb                  | 18.41 ± 0.92                                                                |
| Ak60Hg-Sb               | 53.15 ± 2.66                                                                |
| Ak60Sb-Sb               | 50.99 ± 2.55                                                                |
| Ak60As-Sb               | 47.65 ± 2.38                                                                |
| Ak60Sb-As <sup>5+</sup> | 41.26 ± 2.06                                                                |
| Ak60As-As <sup>5+</sup> | 47.29 ± 2.36                                                                |
| pAk-As <sup>3+</sup>    | 8.58 ± 0.43                                                                 |
| Ak60Hg-As <sup>3+</sup> | 11.73 ± 0.59                                                                |
| Ak60Sb-As <sup>3+</sup> | 15.68 ± 0.78                                                                |
| Ak60As-As <sup>3+</sup> | 12.79 ± 0.64                                                                |

**Table SI\_3.** Results of the adjustment of the adsorption kinetics to the nonlinear kinetic models of Bangham, Simplified Elovich, Elovich and Lagergren. Here,  $Q_{max, exp}$  is the mean experimental maximum amount of adsorbate sorbed (mg g<sup>-1</sup>) at 60 minutes,  $k$  is the Bangham diffusion rate (mg g<sup>-1</sup> s<sup>-v</sup>),  $\vartheta$  is a parameter in the Bangham model,  $\alpha$  is the initial sorption rate in the Elovich model (mg g<sup>-1</sup> s<sup>-1</sup>),  $\beta$  is the constant related to the extent of surface coverage and activation energy for chemisorption in the Elovich model (g mg<sup>-1</sup>),  $Q_{max}$  is the maximum amount of adsorbate adsorbed (mg g<sup>-1</sup>) in the Lagergren model and finally,  $K'_{ad}$  is a pseudo adsorption rate constant (s<sup>-1</sup>) in Lagergren model. E is the root mean square error. Empty cells with a dash indicate that the experimental data did not converge to the specified nonlinear models.

|                         |                    | Nonlinear kinetic model of adsorption |                |       |                    |                |       |                  |                |       |                |                  |       |
|-------------------------|--------------------|---------------------------------------|----------------|-------|--------------------|----------------|-------|------------------|----------------|-------|----------------|------------------|-------|
|                         |                    | Bangham                               |                |       | Simplified Elovich |                |       | Elovich          |                |       | Lagergren      |                  |       |
| Sample                  | $Q_{\max}$<br>exp. | $k$                                   | $\vartheta$    | E     | $\alpha$           | $\beta$        | E     | $\alpha$         | $\beta$        | E     | $Q_{\max}$     | $K'_{ad}$        | E     |
| pAk-Hg <sup>2+</sup>    | 4.1                | 0.04<br>±0.004                        | 0.14<br>±0.03  | 0.605 | -                  | -              | -     | -                | -              | -     | 3.71<br>±0.23  | 0.01<br>±0.003   | 0.692 |
| Ak60Hg-Hg <sup>2+</sup> | 4.4                | 0.05<br>±0.002                        | 0.11<br>±0.02  | 0.301 | -                  | -              | -     | -                | -              | -     | 4.10<br>±0.12  | 0.02<br>±0.002   | 0.335 |
| Ak60Sb-Hg <sup>2+</sup> | 5.5                | 0.04<br>±0.003                        | 0.19<br>±0.02  | 0.411 | -                  | -              | -     | -                | -              | -     | 4.45<br>±0.30  | 0.01<br>±0.003   | 0.904 |
| Ak60As-Hg <sup>2+</sup> | 6.0                | 0.08<br>±0.002                        | 0.07<br>±0.01  | 0.251 | -                  | -              | -     | -                | -              | -     | 5.46<br>±0.15  | 0.03<br>±0.01    | 0.508 |
|                         |                    |                                       |                |       |                    |                |       |                  |                |       |                |                  |       |
| pAk-As <sup>3+</sup>    | 8.6                | 0.06<br>±0.002                        | 0.21<br>±0.01  | 0.452 | 0.24<br>±0.03      | 0.75<br>±0.02  | 0.275 | 0.22<br>±0.03    | 0.74<br>±0.03  | 0.287 | 7.53<br>±0.18  | 0.01<br>±0.004   | 0.697 |
| Ak60Hg-As <sup>3+</sup> | 11.7               | 0.1<br>±0.002                         | 0.17<br>±0.01  | 0.351 | 1.13<br>±0.19      | 0.68<br>±0.02  | 0.322 | 1.09<br>±0.18    | 0.68<br>±0.02  | 0.321 | 9.87<br>±0.27  | 0.01<br>±0.001   | 1.256 |
| Ak60Sb-As <sup>3+</sup> | 15.7               | 0.09<br>±0.004                        | 0.26<br>±0.01  | 0.856 | 0.22<br>±0.02      | 0.35<br>±0.01  | 0.447 | 0.18<br>±0.02    | 0.33<br>±0.01  | 0.468 | 14.61<br>±0.36 | 0.003<br>±0.0003 | 1.208 |
| Ak60As-As <sup>3+</sup> | 12.8               | 0.11<br>±0.002                        | 0.16<br>±0.01  | 0.481 | 1.36<br>±0.19      | 0.62<br>±0.02  | 0.307 | 1.34<br>±0.20    | 0.61<br>±0.02  | 0.311 | 11.15<br>±0.24 | 0.01<br>±0.001   | 1.121 |
|                         |                    |                                       |                |       |                    |                |       |                  |                |       |                |                  |       |
| Ak60Sb-As <sup>5+</sup> | 41.3               | 0.22<br>±0.01                         | 0.29<br>±0.01  | 1.550 | 0.43<br>±0.02      | 0.13<br>±0.002 | 0.684 | 0.32<br>±0.01    | 0.12<br>±0.001 | 0.477 | 37.81<br>±1.04 | 0.002<br>±0.0002 | 3.251 |
| Ak60As-As <sup>5+</sup> | 47.3               | 0.31<br>±0.01                         | 0.22<br>±0.01  | 2.181 | 1.52<br>±0.31      | 0.15<br>±0.01  | 2.253 | 1.31<br>±0.27    | 0.15<br>±0.01  | 1.134 | -              | -                | -     |
|                         |                    |                                       |                |       |                    |                |       |                  |                |       |                |                  |       |
| pAk-Sb <sup>3+</sup>    | 18.4               | 0.01<br>±0.01                         | 0.29<br>±0.01  | 0.461 | 0.20<br>±0.02      | 0.31<br>±0.01  | 0.561 | 0.15<br>±0.01    | 0.29<br>±0.01  | 0.465 | 16.05<br>±0.66 | 0.002<br>±0.0    | 1.796 |
| Ak60Hg-Sb <sup>3+</sup> | 53.1               | 0.41<br>±0.01                         | 0.19<br>±0.01  | 1.577 | 3.23<br>±0.81      | 0.14<br>±0.01  | 2.241 | 3.02<br>±0.78    | 0.14<br>±0.01  | 2.216 | -              | -                | -     |
| Ak60Sb-Sb <sup>3+</sup> | 51.0               | 0.50<br>±0.02                         | 0.14<br>±0.01  | 2.784 | 9.40<br>±3.11      | 0.16<br>±0.01  | 2.093 | 9.40<br>±3.20    | 0.16<br>±0.01  | 2.104 | -              | -                | -     |
| Ak60As-Sb <sup>3+</sup> | 47.6               | 0.53<br>±0.01                         | 0.10<br>±0.004 | 0.890 | 176.56<br>±45.05   | 0.25<br>±0.01  | 0.672 | 176.49<br>±45.08 | 0.25<br>±0.01  | 0.672 | 42.22<br>±0.79 | 0.02<br>±0.002   | 3.222 |

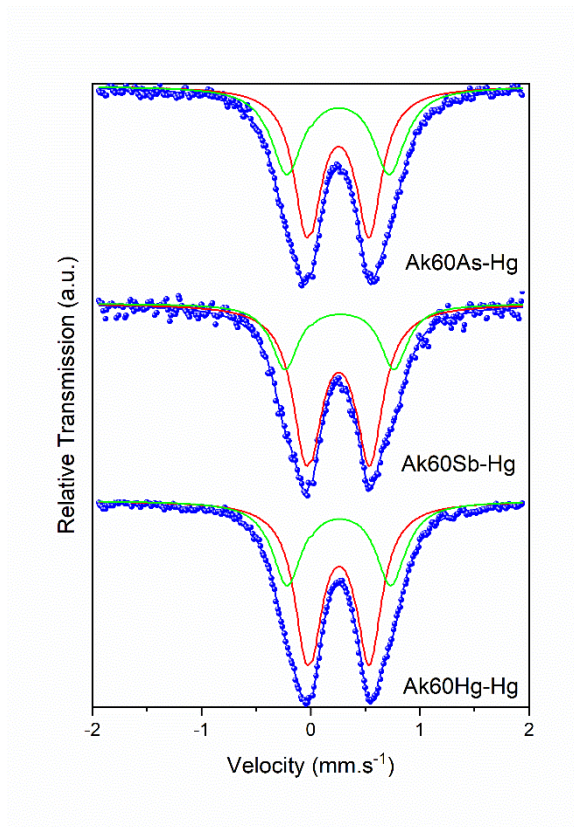

**Figure SI\_1.** 300 K Mössbauer spectra of co-precipitated akaganeites after adsorption of Hg.

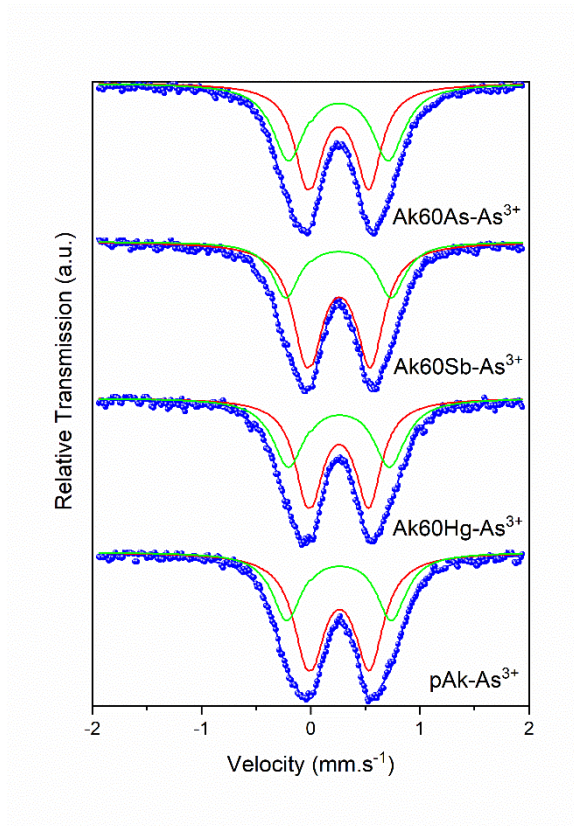

**Figure SI\_2.** 300 K Mössbauer spectra of co-precipitated akaganeites after adsorption of As<sup>3+</sup>.

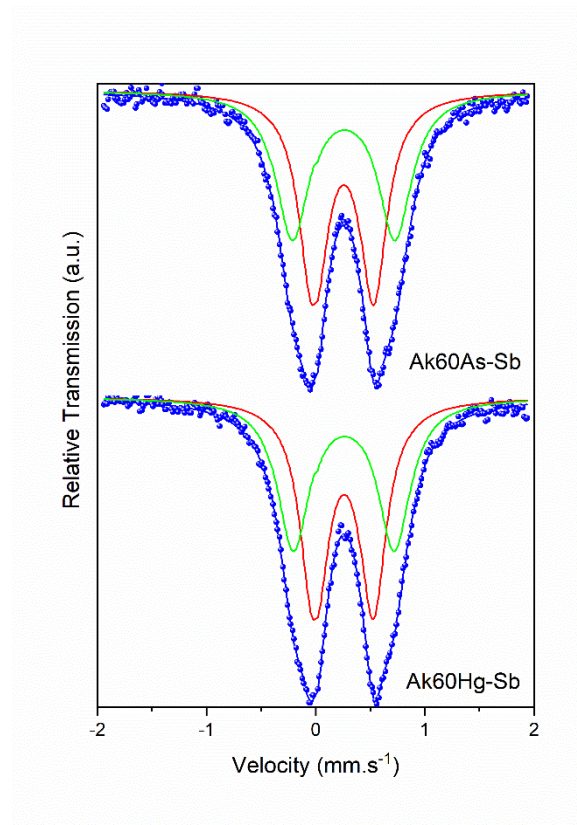

**Figure SI\_3.** 300 K Mössbauer spectra of co-precipitated akaganeites after adsorption of Sb.

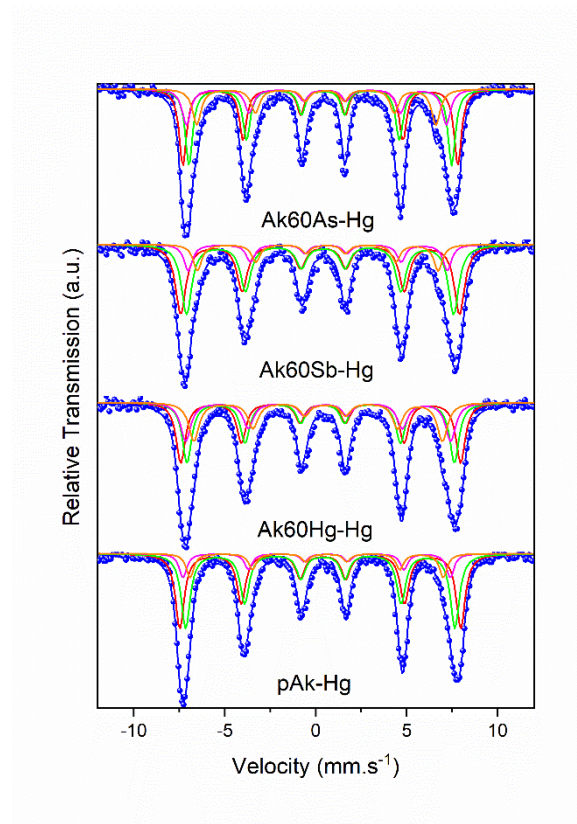

**Figure SI\_4.** 77 K Mössbauer spectra of co-precipitated akaganeites after adsorption of Hg.



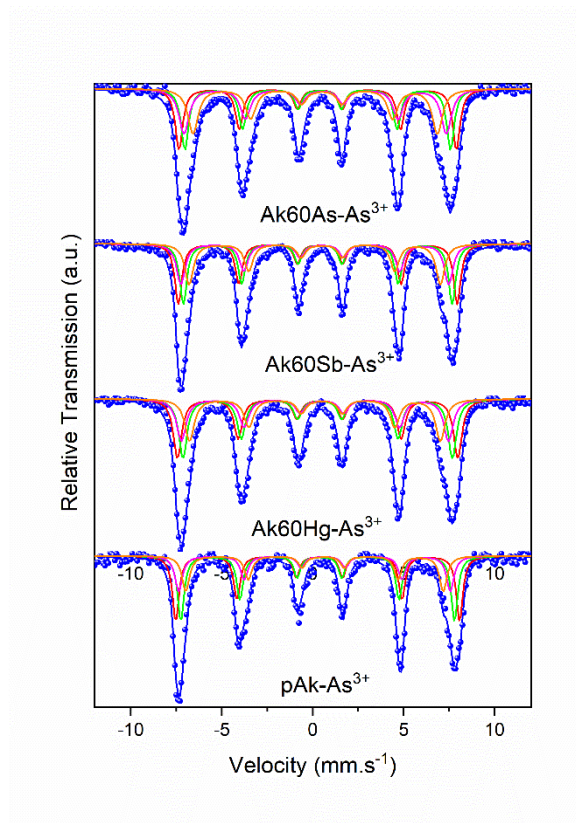

**Figure SI\_5.** 77 K Mössbauer spectra of co-precipitated akaganeites after adsorption of  $\text{As}^{3+}$ .

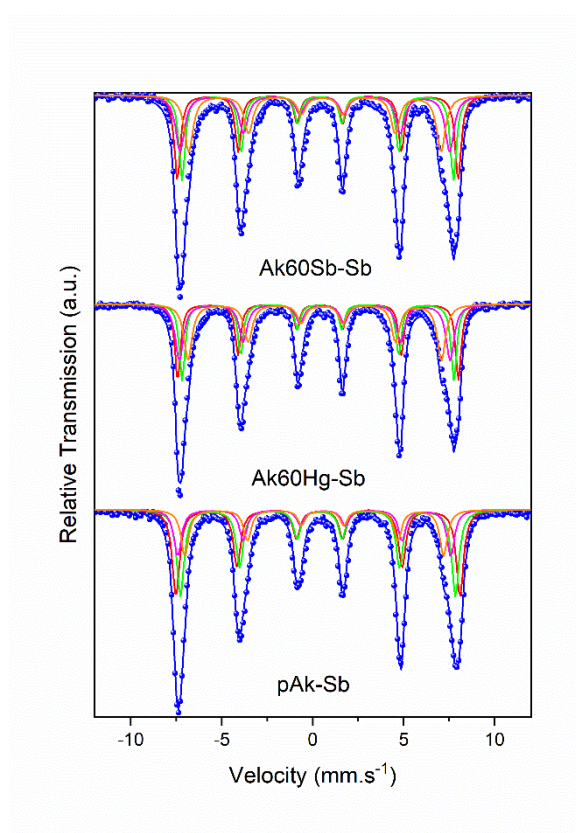

**Figure SI\_6.** 77 K Mössbauer spectra of co-precipitated akaganeites after adsorption of Sb.

**Table SI\_4.** Values of hyperfine parameters derived from the fits of the 300 K Mössbauer spectra for co-precipitated akaganeites before and after adsorption of different pollutants. Isomer shift ( $\delta$ ), quadrupole splitting ( $\Delta$ ), linewidth ( $\Gamma/2$ ) and relative adsorption area (A).

| Sample                  | Components | $\delta$ (mm/s)  | $\Delta$ (mm/s) | $\Gamma/2$ (mm/s) | Area (%) $\pm 2$ |
|-------------------------|------------|------------------|-----------------|-------------------|------------------|
| pAk                     | D1         | 0.38 $\pm$ 0.01  | 0.54 $\pm$ 0.01 | 0.15 $\pm$ 0.01   | 60               |
|                         | D2         | 0.39 $\pm$ 0.01  | 0.94 $\pm$ 0.01 | 0.17 $\pm$ 0.01   | 40               |
| pAk-As <sup>3+</sup>    | D1         | 0.38 $\pm$ 0.01  | 0.54 $\pm$ 0.01 | 0.16 $\pm$ 0.01   | 62               |
|                         | D2         | 0.38 $\pm$ 0.01  | 0.95 $\pm$ 0.02 | 0.16 $\pm$ 0.01   | 38               |
| Ak60Hg                  | D1         | 0.38 $\pm$ 0.002 | 0.55 $\pm$ 0.01 | 0.16 $\pm$ 0.002  | 62               |
|                         | D2         | 0.38 $\pm$ 0.002 | 0.94 $\pm$ 0.01 | 0.18 $\pm$ 0.01   | 38               |
| Ak60Hg-Hg               | D1         | 0.38 $\pm$ 0.01  | 0.55 $\pm$ 0.01 | 0.14 $\pm$ 0.01   | 62               |
|                         | D2         | 0.38 $\pm$ 0.01  | 0.94 $\pm$ 0.01 | 0.17 $\pm$ 0.01   | 38               |
| Ak60Hg-Sb               | D1         | 0.38 $\pm$ 0.01  | 0.53 $\pm$ 0.01 | 0.15 $\pm$ 0.01   | 53               |
|                         | D2         | 0.38 $\pm$ 0.01  | 0.91 $\pm$ 0.01 | 0.18 $\pm$ 0.01   | 47               |
| Ak60Hg-As <sup>3+</sup> | D1         | 0.38 $\pm$ 0.01  | 0.54 $\pm$ 0.01 | 0.15 $\pm$ 0.01   | 56               |
|                         | D2         | 0.38 $\pm$ 0.01  | 0.91 $\pm$ 0.01 | 0.18 $\pm$ 0.01   | 44               |
| Ak60Sb                  | D1         | 0.38 $\pm$ 0.01  | 0.54 $\pm$ 0.00 | 0.17 $\pm$ 0.01   | 65               |
|                         | D2         | 0.38 $\pm$ 0.01  | 0.95 $\pm$ 0.01 | 0.18 $\pm$ 0.01   | 35               |
| Ak60Sb-Hg               | D1         | 0.37 $\pm$ 0.01  | 0.56 $\pm$ 0.01 | 0.15 $\pm$ 0.01   | 70               |
|                         | D2         | 0.39 $\pm$ 0.01  | 0.99 $\pm$ 0.01 | 0.15 $\pm$ 0.01   | 30               |
| Ak60Sb-As <sup>3+</sup> | D1         | 0.38 $\pm$ 0.01  | 0.56 $\pm$ 0.01 | 0.16 $\pm$ 0.01   | 69               |
|                         | D2         | 0.38 $\pm$ 0.01  | 0.95 $\pm$ 0.01 | 0.15 $\pm$ 0.01   | 31               |
| Ak60As                  | D1         | 0.38 $\pm$ 0.01  | 0.56 $\pm$ 0.01 | 0.17 $\pm$ 0.01   | 59               |
|                         | D2         | 0.38 $\pm$ 0.01  | 0.94 $\pm$ 0.01 | 0.20 $\pm$ 0.01   | 41               |
| Ak60As-Hg               | D1         | 0.37 $\pm$ 0.01  | 0.55 $\pm$ 0.01 | 0.14 $\pm$ 0.01   | 57               |
|                         | D2         | 0.37 $\pm$ 0.01  | 0.93 $\pm$ 0.01 | 0.18 $\pm$ 0.01   | 43               |
| Ak60As-Sb               | D1         | 0.37 $\pm$ 0.01  | 0.54 $\pm$ 0.01 | 0.15 $\pm$ 0.01   | 53               |
|                         | D2         | 0.38 $\pm$ 0.01  | 0.93 $\pm$ 0.01 | 0.19 $\pm$ 0.01   | 47               |
| Ak60As-As <sup>3+</sup> | D1         | 0.37 $\pm$ 0.01  | 0.54 $\pm$ 0.01 | 0.14 $\pm$ 0.01   | 52               |
|                         | D2         | 0.38 $\pm$ 0.01  | 0.90 $\pm$ 0.01 | 0.18 $\pm$ 0.01   | 48               |

**Table SI\_5.** Values of hyperfine parameters derived from the fits of the 77 K Mössbauer spectra for co-precipitated akaganeites before and after adsorption of different pollutants. Isomer shift ( $\delta$ ), quadrupolar shift ( $2\varepsilon$ ), hyperfine field ( $B_{\text{hf}}$ ) and relative adsorption area (A).

| Sample                  | S1                  |                          |                   |                        | S2                  |                          |                    |                        | S3                 |                          |                   |                        | S4                 |                          |                    |                        |
|-------------------------|---------------------|--------------------------|-------------------|------------------------|---------------------|--------------------------|--------------------|------------------------|--------------------|--------------------------|-------------------|------------------------|--------------------|--------------------------|--------------------|------------------------|
|                         | $\delta$<br>(mm/s)  | $2\varepsilon$<br>(mm/s) | B<br>(T)          | Area<br>(%)<br>$\pm 2$ | $\delta$<br>(mm/s)  | $2\varepsilon$<br>(mm/s) | B (T)              | Area<br>(%)<br>$\pm 2$ | $\delta$<br>(mm/s) | $2\varepsilon$<br>(mm/s) | B<br>(T)          | Area<br>(%)<br>$\pm 2$ | $\delta$<br>(mm/s) | $2\varepsilon$<br>(mm/s) | B (T)              | Area<br>(%)<br>$\pm 2$ |
| pAk                     | 0.50<br>$\pm 0.01$  | -0.09<br>$\pm 0.01$      | 48<br>$\pm 0.5$   | 28                     | 0.50<br>$\pm 0.01$  | -0.09<br>$\pm 0.01$      | 46.5<br>$\pm 0.8$  | 28                     | 0.47<br>$\pm 0.01$ | -0.39<br>$\pm 0.02$      | 46.3<br>$\pm 2.0$ | 22                     | 0.47<br>$\pm 0.01$ | -0.39<br>$\pm 0.02$      | 44.0<br>$\pm 1.2$  | 22                     |
| pAk-Hg                  | 0.48<br>$\pm 0.01$  | -0.14<br>$\pm 0.01$      | 47.7<br>$\pm 0.1$ | 39                     | 0.48<br>$\pm 0.01$  | -0.14<br>$\pm 0.01$      | 45.7<br>$\pm 0.1$  | 39                     | 0.47<br>$\pm 0.01$ | -0.53<br>$\pm 0.04$      | 45.4<br>$\pm 29$  | 11                     | 0.47<br>$\pm 0.01$ | -0.53<br>$\pm 0.04$      | 43.0<br>$\pm 20$   | 11                     |
| pAk-Sb                  | 0.49<br>$\pm 0.01$  | -0.09<br>$\pm 0.01$      | 48.2<br>$\pm 0.1$ | 32                     | 0.49<br>$\pm 0.01$  | -0.09<br>$\pm 0.01$      | 46.7<br>$\pm 0.1$  | 32                     | 0.47<br>$\pm 0.01$ | -0.47<br>$\pm 0.02$      | 46.4<br>$\pm 21$  | 18                     | 0.47<br>$\pm 0.01$ | -0.47<br>$\pm 0.02$      | 43.9<br>$\pm 12$   | 18                     |
| pAk-As <sup>3+</sup>    | 0.48<br>$\pm 0.01$  | -0.10<br>$\pm 0.02$      | 48.2<br>$\pm 0.1$ | 31                     | 0.48<br>$\pm 0.01$  | -0.10<br>$\pm 0.02$      | 46.5<br>$\pm 0.1$  | 31                     | 0.50<br>$\pm 0.01$ | -0.48<br>$\pm 0.03$      | 46.1<br>$\pm 24$  | 19                     | 0.50<br>$\pm 0.01$ | -0.48<br>$\pm 0.03$      | 43.7<br>$\pm 16$   | 19                     |
|                         |                     |                          |                   |                        |                     |                          |                    |                        |                    |                          |                   |                        |                    |                          |                    |                        |
| Ak60Hg                  | 0.48<br>$\pm 0.01$  | -0.13<br>$\pm 0.01$      | 47.2<br>$\pm 0.5$ | 30                     | 0.48<br>$\pm 0.01$  | -0.13<br>$\pm 0.01$      | 45.6<br>$\pm 0.6$  | 30                     | 0.46<br>$\pm 0.01$ | -0.40<br>$\pm 0.02$      | 45.1<br>$\pm 1.7$ | 20                     | 0.46<br>$\pm 0.01$ | -0.40<br>$\pm 0.02$      | 42.3<br>$\pm 1.04$ | 20                     |
| Ak60Hg-Hg               | 0.49<br>$\pm 0.01$  | -0.12<br>$\pm 0.02$      | 47.5<br>$\pm 0.1$ | 29                     | 0.49<br>$\pm 0.01$  | -0.12<br>$\pm 0.02$      | 45.4<br>$\pm 13$   | 29                     | 0.49<br>$\pm 0.01$ | -0.39<br>$\pm 0.03$      | 45.0<br>$\pm 31$  | 21                     | 0.49<br>$\pm 0.01$ | -0.39<br>$\pm 0.03$      | 42.2<br>$\pm 19$   | 21                     |
| Ak60Hg-Sb               | 0.50<br>$\pm 0.01$  | -0.09<br>$\pm 0.01$      | 47.7<br>$\pm 0.1$ | 24                     | 0.50<br>$\pm 0.01$  | -0.09<br>$\pm 0.01$      | 46.1<br>$\pm 0.1$  | 24                     | 0.46<br>$\pm 0.01$ | -0.40<br>$\pm 0.02$      | 46.0<br>$\pm 18$  | 26                     | 0.46<br>$\pm 0.01$ | -0.40<br>$\pm 0.02$      | 43.0<br>$\pm 10$   | 26                     |
| Ak60Hg-As <sup>3+</sup> | 0.49<br>$\pm 0.01$  | -0.11<br>$\pm 0.02$      | 47.6<br>$\pm 0.1$ | 28                     | 0.49<br>$\pm 0.01$  | -0.11<br>$\pm 0.02$      | 45.7<br>$\pm 11$   | 28                     | 0.47<br>$\pm 0.01$ | -0.38<br>$\pm 0.02$      | 45.3<br>$\pm 25$  | 22                     | 0.47<br>$\pm 0.01$ | -0.38<br>$\pm 0.02$      | 42.5<br>$\pm 15$   | 22                     |
|                         |                     |                          |                   |                        |                     |                          |                    |                        |                    |                          |                   |                        |                    |                          |                    |                        |
| Ak60Sb                  | 0.50<br>$\pm 0.004$ | -0.14<br>$\pm 0.01$      | 47.2<br>$\pm 0.5$ | 30                     | 0.50<br>$\pm 0.004$ | -0.14<br>$\pm 0.01$      | 47.2<br>$\pm 0.5$  | 30                     | 0.47<br>$\pm 0.01$ | -0.41<br>$\pm 0.04$      | 45.1<br>$\pm 1.6$ | 20                     | 0.47<br>$\pm 0.01$ | -0.41<br>$\pm 0.04$      | 42.3<br>$\pm 1.0$  | 20                     |
| Ak60Sb-Hg               | 0.48<br>$\pm 0.01$  | -0.17<br>$\pm 0.01$      | 47.3<br>$\pm 0.1$ | 38                     | 0.48<br>$\pm 0.01$  | -0.17<br>$\pm 0.01$      | 45.3<br>$\pm 11.0$ | 38                     | 0.49<br>$\pm 0.01$ | -0.44<br>$\pm 0.03$      | 43.9<br>$\pm 27$  | 12                     | 0.49<br>$\pm 0.01$ | -0.44<br>$\pm 0.03$      | 40.8<br>$\pm 19$   | 12                     |
| Ak60Sb-Sb               | 0.49<br>$\pm 0.01$  | -0.12<br>$\pm 0.01$      | 47.7<br>$\pm 0.1$ | 26                     | 0.49<br>$\pm 0.01$  | -0.12<br>$\pm 0.01$      | 46.1<br>$\pm 0.1$  | 26                     | 0.47<br>$\pm 0.01$ | -0.39<br>$\pm 0.02$      | 45.7<br>$\pm 21$  | 24                     | 0.47<br>$\pm 0.01$ | -0.39<br>$\pm 0.02$      | 42.8<br>$\pm 12$   | 24                     |
| Ak60Sb-As <sup>3+</sup> | 0.50<br>$\pm 0.01$  | -0.12<br>$\pm 0.01$      | 47.3<br>$\pm 0.1$ | 28                     | 0.50<br>$\pm 0.01$  | -0.12<br>$\pm 0.01$      | 45.6<br>$\pm 0.1$  | 28                     | 0.46<br>$\pm 0.01$ | -0.38<br>$\pm 0.02$      | 45.5<br>$\pm 20$  | 22                     | 0.46<br>$\pm 0.01$ | -0.38<br>$\pm 0.02$      | 42.6<br>$\pm 13$   | 22                     |
|                         |                     |                          |                   |                        |                     |                          |                    |                        |                    |                          |                   |                        |                    |                          |                    |                        |
| Ak60As                  | 0.48<br>$\pm 0.01$  | -0.14<br>$\pm 0.01$      | 46.7<br>$\pm 0.7$ | 27                     | 0.48<br>$\pm 0.01$  | -0.14<br>$\pm 0.01$      | 44.9<br>$\pm 0.8$  | 27                     | 0.45<br>$\pm 0.01$ | -0.38<br>$\pm 0.02$      | 44.2<br>$\pm 2.5$ | 23                     | 0.45<br>$\pm 0.01$ | -0.38<br>$\pm 0.02$      | 41.1<br>$\pm 1.5$  | 23                     |
| Ak60As-Hg               | 0.48<br>$\pm 0.01$  | -0.15<br>$\pm 0.01$      | 46.7<br>$\pm 0.1$ | 32                     | 0.48<br>$\pm 0.01$  | -0.15<br>$\pm 0.01$      | 44.6<br>$\pm 0.1$  | 32                     | 0.42<br>$\pm 0.01$ | -0.46<br>$\pm 0.03$      | 44.1<br>$\pm 22$  | 18                     | 0.42<br>$\pm 0.01$ | -0.46<br>$\pm 0.03$      | 40.5<br>$\pm 15$   | 18                     |
| Ak60As-As <sup>3+</sup> | 0.49<br>$\pm 0.01$  | -0.12<br>$\pm 0.02$      | 47.1<br>$\pm 0.1$ | 25                     | 0.49<br>$\pm 0.01$  | -0.12<br>$\pm 0.02$      | 45.1<br>$\pm 10$   | 25                     | 0.47<br>$\pm 0.01$ | -0.36<br>$\pm 0.02$      | 44.5<br>$\pm 29$  | 25                     | 0.47<br>$\pm 0.01$ | -0.36<br>$\pm 0.02$      | 41.4<br>$\pm 16$   | 25                     |

**Table SI\_6.** Mean values of hyperfine parameters derived from the fits of the 300 K Mössbauer spectra for co-precipitated akaganeites before and after adsorption of different pollutants. Isomer shift ( $\delta$ ), quadrupole splitting ( $\Delta$ ) and linewidth ( $\Gamma/2$ ).



| Sample                  | Mean $\delta$ (mm/s) | Mean $\Delta$ (mm/s) | Mean $\Gamma/2$ (mm/s) |
|-------------------------|----------------------|----------------------|------------------------|
| pAk                     | 0.38                 | 0.70                 | 0.16                   |
| pAk-As <sup>3+</sup>    | 0.38                 | 0.70                 | 0.16                   |
|                         |                      |                      |                        |
| Ak60Hg                  | 0.38                 | 0.70                 | 0.16                   |
| Ak60Hg-Hg               | 0.38                 | 0.70                 | 0.15                   |
| Ak60Hg-Sb               | 0.38                 | 0.71                 | 0.16                   |
| Ak60Hg-As <sup>3+</sup> | 0.38                 | 0.70                 | 0.6                    |
|                         |                      |                      |                        |
| Ak60Sb                  | 0.38                 | 0.69                 | 0.17                   |
| Ak60Sb-Hg               | 0.38                 | 0.69                 | 0.15                   |
| Ak60Sb-As <sup>3+</sup> | 0.38                 | 0.68                 | 0.15                   |
|                         |                      |                      |                        |
| Ak60As                  | 0.38                 | 0.72                 | 0.18                   |
| Ak60As-Hg               | 0.37                 | 0.71                 | 0.16                   |
| Ak60As-Sb               | 0.37                 | 0.72                 | 0.17                   |
| Ak60As-As <sup>3+</sup> | 0.37                 | 0.71                 | 0.16                   |

**Table SI\_7.** Mean values of hyperfine parameters derived from the fits of the 77 K Mössbauer spectra for co-precipitated akaganeites before and after adsorption of different pollutants. Isomer shift ( $\delta$ ), quadrupolar shift ( $2\varepsilon$ ), linewidth ( $\Gamma/2$ ) and hyperfine field ( $B_{hf}$ ).

| Sample                  | Mean $\delta$ (mm/s) | Mean $2\varepsilon$ (mm/s) | Mean $\Gamma/2$ (mm/s) | Mean $B_{hf}$ (T) |
|-------------------------|----------------------|----------------------------|------------------------|-------------------|
| pAk                     | 0.49                 | -0.22                      | 0.21                   | 46.3              |
| pAk-Hg                  | 0.48                 | -0.23                      | 0.29                   | 46.1              |
| pAk-Sb                  | 0.48                 | -0.23                      | 0.25                   | 46.6              |
| pAk-As <sup>3+</sup>    | 0.49                 | -0.24                      | 0.23                   | 46.4              |
|                         |                      |                            |                        |                   |
| Ak60Hg                  | 0.47                 | -0.24                      | 0.23                   | 45.3              |
| Ak60Hg-Hg               | 0.49                 | -0.23                      | 0.32                   | 45.3              |
| Ak60Hg-Sb               | 0.49                 | -0.25                      | 0.23                   | 45.6              |
| Ak60Hg-As <sup>3+</sup> | 0.48                 | -0.23                      | 0.29                   | 45.4              |
|                         |                      |                            |                        |                   |
| Ak60Sb                  | 0.49                 | -0.25                      | 0.23                   | 45.8              |
| Ak60Sb-Hg               | 0.49                 | -0.24                      | 0.33                   | 45.4              |
| Ak60Sb-Sb               | 0.48                 | -0.25                      | 0.25                   | 45.6              |
| Ak60Sb-As <sup>3+</sup> | 0.48                 | -0.24                      | 0.26                   | 45.4              |
|                         |                      |                            |                        |                   |
| Ak60As                  | 0.47                 | -0.25                      | 0.25                   | 44.4              |
| Ak60As-Hg               | 0.46                 | -0.26                      | 0.26                   | 44.5              |
| Ak60As-As <sup>3+</sup> | 0.48                 | -0.24                      | 0.29                   | 44.5              |
